# Supplementary material for: Elucidation of Olive Oil Oxidation Mechanisms by Analysis of Triacylglycerol Hydroperoxide Isomers Using LC-MS/MS
Source: MDPI journal article supplement (doi:10.3390/molecules27165282), 2022-08-18
Supplement: s1 [file s1]

# Supporting Information 1

| Analysis mode                        | Q1 mass scan (+) | Product ion scan (+) |
|--------------------------------------|------------------|----------------------|
| Precursor ion ( $m/z$ )              | -                | 940                  |
| Product ion ( $m/z$ )                | -                | -                    |
| Scan range ( $m/z$ )                 | 100-1000         |                      |
| Curtain gas (psi)                    | 10               |                      |
| Ion spray voltage (V)                | 5500             |                      |
| Turbo gas temperature (°C)           | 0                |                      |
| Turbo gas (psi)                      | 15               |                      |
| Nebulizer gas (psi)                  | 0                |                      |
| Collision-activated dissociation gas | -                | 4                    |
| Declustering potential (V)           | 180              |                      |
| Entrance potential (V)               | 10               |                      |
| Collision energy (V)                 | -                | 55                   |
| Collision cell exit potential (V)    | -                | 30                   |

| Analysis mode                        | MRM (+)                |                         |                         |                         |
|--------------------------------------|------------------------|-------------------------|-------------------------|-------------------------|
| Precursor ion ( $m/z$ )              | TG 18:1_18:1_18:2;9OOH | TG 18:1_18:1_18:2;10OOH | TG 18:1_18:1_18:2;12OOH | TG 18:1_18:1_18:2;13OOH |
| Product ion ( $m/z$ )                | 769                    | 810                     | 809                     | 850                     |
| Curtain gas (psi)                    |                        |                         | 20                      |                         |
| Ion spray voltage (V)                |                        |                         | 5500                    |                         |
| Turbo gas temperature (°C)           |                        |                         | 400                     |                         |
| Turbo gas (psi)                      |                        |                         | 50                      |                         |
| Nebulizer gas (psi)                  |                        |                         | 70                      |                         |
| Collision-activated dissociation gas |                        |                         | 3                       |                         |
| Declustering potential (V)           | 66                     | 66                      | 51                      | 66                      |
| Entrance potential (V)               | 10                     | 10                      | 10                      | 10                      |
| Collision energy (V)                 | 39                     | 39                      | 45                      | 43                      |
| Collision cell exit potential (V)    | 26                     | 36                      | 14                      | 16                      |

| Analysis mode                        | MRM (+)                |                        |                         |                         |
|--------------------------------------|------------------------|------------------------|-------------------------|-------------------------|
| Precursor ion ( $m/z$ )              | TG 18:1_18:1_18:1;8OOH | TG 18:1_18:1_18:1;9OOH | TG 18:1_18:1_18:1;10OOH | TG 18:1_18:1_18:1;11OOH |
| Product ion ( $m/z$ )                | 755                    | 769                    | 810                     | 824                     |
| Curtain gas (psi)                    |                        |                        | 20                      |                         |
| Ion spray voltage (V)                |                        |                        | 5500                    |                         |
| Turbo gas temperature (°C)           |                        |                        | 400                     |                         |
| Turbo gas (psi)                      |                        |                        | 50                      |                         |
| Nebulizer gas (psi)                  |                        |                        | 70                      |                         |
| Collision-activated dissociation gas |                        |                        | 3                       |                         |
| Declustering potential (V)           | 180                    | 176                    | 186                     | 180                     |
| Entrance potential (V)               | 10                     | 10                     | 10                      | 10                      |
| Collision energy (V)                 | 44                     | 45                     | 43                      | 52                      |
| Collision cell exit potential (V)    | 12                     | 24                     | 42                      | 13                      |
